# Supplementary material
Source: publisher figshare collection journal article supplement (https://acs.figshare.com/ndownloader/files/6635787)
Supplement: Supplementary file 1 [file 6635787]

## **SUPPORTING INFORMATION**

### **Metal Ion Binding at the Catalytic Site Induces Widely Distributed Changes in a Sequence Specific Protein-DNA Complex**

Kaustubh Sinha<sup>1,2</sup>, Sahil S. Sangani<sup>2</sup>, Andrew D. Kehr<sup>2</sup>

Gordon S. Rule<sup>2,\*</sup> and Linda Jen-Jacobson<sup>1,\*</sup>

<sup>1</sup> Department of Biological Sciences, University of Pittsburgh, Pittsburgh PA 15260 USA

<sup>2</sup> Department of Biological Sciences, Carnegie Mellon University, Pittsburgh PA 15213 USA

## Supplementary Tables

**Table S1.** Sidechain truncation mutations cause CSPs

| Mutation           | Prominent Methyl CSPs<br>No Lu <sup>3+</sup>                                                      | Prominent Methyl CSPs<br>+Lu <sup>3+</sup>                                |
|--------------------|---------------------------------------------------------------------------------------------------|---------------------------------------------------------------------------|
| <b>Isoleucines</b> |                                                                                                   |                                                                           |
| I23V               | I43                                                                                               | I43                                                                       |
| I30V               | I24, I159                                                                                         | I24, I159                                                                 |
| I43V               | ND                                                                                                | I51                                                                       |
| I51V               | I43, I55                                                                                          | I43, I52, I55                                                             |
| I52V               | I43, I55, I91, I134                                                                               | I24, I30, I43, I91, I133                                                  |
| I89V               | I51, I52, I55, I91                                                                                | I52, I55, I91                                                             |
| I91V               | I52, I134                                                                                         | I52, I134                                                                 |
| I133V              | I43, I51, I91                                                                                     | I52                                                                       |
| <b>Valines</b>     |                                                                                                   |                                                                           |
| V20A               | I43, I51 (no CSP in LV peaks)                                                                     | I24, I30, I43*, I52, I91<br>L3δ1, L33δ2, V63γ1, L156δ1,<br>V166γ2, V168γ2 |
| V63A               | I24, I30, I43, I51, I52, I55, I91, I133, I134<br>L3δ2, L7δ2, L77δ1, L148δ1, V166γ1γ2,<br>V168γ1γ2 | I24, I30, I51, I52, I91,<br>L3δ1, L77δ2, L148δ1, V166γ1γ2,<br>V168γ1γ2    |
| <b>Leucines</b>    |                                                                                                   |                                                                           |
| L156V              | I24, I30, I43, I153<br>(no CSP LV peaks)                                                          | I24, I30, I153, V122γ1                                                    |

\*Spot intensifies but does not shift

Other mutants examined are listed in Materials & Methods.

**Table S2.** Crystallographic data collection and refinement statistics for EcoRV-DNA-Lu<sup>3+</sup> complexes

|                                        | 5F8A<br>Intact DNA     | 5HLK<br>Cleaved DNA    |
|----------------------------------------|------------------------|------------------------|
| <b>Data collection</b>                 |                        |                        |
| Space group                            | P1                     | P1                     |
| Cell dimensions                        |                        |                        |
| a, b, c (Å)                            | 46.43, 52.86, 65.31    | 47.62, 48.33, 63.53    |
| $\alpha$ , $\beta$ , $\gamma$ (°)      | 70.61, 73.24, 81.81    | 96.94, 108.78, 106.70  |
| Resolution range (Å)                   | 24.90-1.76 (1.85-1.76) | 38.11-2.00 (2.05-2.00) |
| Wavelength (Å)                         | 1.54178                | 1.54178                |
| R <sub>sym</sub> or R <sub>merge</sub> | 0.051 (0.196)          | 0.051 (0.224)          |
| I / $\sigma$ I                         | 14.7 (4.4)             | 20.3 (3.2)             |
| Completeness (%)                       | 93.0 (88.9)            | 84.3 (27.8)            |
| Redundancy                             | 3.9 (3.2)              | 4.3 (1.7)              |
| <b>Refinement</b>                      |                        |                        |
| Resolution (Å)                         | 1.76                   | 2.00                   |
| No. reflections                        | 46648                  | 26617                  |
| R <sub>work</sub> / R <sub>free</sub>  | 0.159 / 0.202          | 0.165 / 0.228          |
| R <sub>free</sub> test set             | 10.71%                 | 5.13%                  |
| B-factors                              |                        |                        |
| Wilson plot (Å <sup>2</sup> )          | 21.69                  | 18.60                  |
| Overall (Å <sup>2</sup> )              | 27.61                  | 22.44                  |
| Ramachandran plot                      |                        |                        |
| Favored                                | 464 (97.3%)            | 463 (96.3%)            |
| Outliers                               | 4 (0.84%)              | 3 (0.62%)              |
| R.m.s. deviations                      |                        |                        |
| Bond lengths (Å)                       | 0.017                  | 0.016                  |
| Bond angles (°)                        | 1.876                  | 1.780                  |

Values in parentheses are for highest-resolution shell.

**Table S3:** Conformational analysis of DNA in crystal structures of EcoRV-DNA complexes <sup>a</sup>

| PDB entry             | Space group                      | Metal ion        | DNA sequence <sup>c,d</sup>   | Overall Bend <sup>e</sup> | Roll angle at TA step | Minor groove width (Å) at TA step |
|-----------------------|----------------------------------|------------------|-------------------------------|---------------------------|-----------------------|-----------------------------------|
| 5F8A                  | P1                               | Lu <sup>3+</sup> | <u>AAAGATATCTTT</u>           | 55.5°                     | 55.5°                 | 10.6                              |
| 1B95                  | P1                               | None             | <u>AAAGATATCTT</u>            | 42.9°                     | 53.6°                 | 10.5                              |
| 1B94                  | P1                               | Ca <sup>2+</sup> | <u>AAAGATATCTT</u>            | 43.4°                     | 57.1°                 | 10.4                              |
| 4RVE (I) <sup>b</sup> | C222 <sub>1</sub>                | None             | <u>GGGATATCCC</u>             | 49.1°                     | 44.4°                 | 11.7                              |
| 1EOO (II)             | C222 <sub>1</sub>                | None             | <u>GAAGATATCTTC</u>           | 59.1°                     | 49.1°                 | 10.3                              |
| 1RVA (III)            | P1                               | None             | <u>AAAGATATCTT</u>            | 42.7°                     | 47.3°                 | 10.2                              |
| 1EOP (IV)             | P4 <sub>1</sub> 2 <sub>1</sub> 2 | None             | <u>AAGATATCTTA</u>            | 44.2°                     | 36.6°                 | 10.2                              |
| 1RVB                  | P1                               | Mg <sup>2+</sup> | <u>AAAGATATCTT</u>            | 43.1°                     | 54.4°                 | 10.2                              |
| 1RVC                  | P1                               | Mg <sup>2+</sup> | <u>AAAGAT</u>   <u>ATCTT</u>  | 44.1°                     | 35.7°                 | 7.7                               |
| 5HLK                  | P1                               | Lu <sup>3+</sup> | <u>AAAGAT</u>   <u>ATCTTT</u> | 38.3°                     | 54°                   | 8.0                               |

<sup>a</sup> DNA structural parameters calculated with Curves+ program provided by Lavery et al. <sup>1</sup>

<sup>b</sup> Crystal lattice forms (I –IV) designated by Horton and Perona <sup>2</sup>.

<sup>c</sup> Bases used to define the best-fit curvilinear axis are underlined.

<sup>d</sup> Vertical bar at TA step indicates cleaved DNA.

<sup>e</sup> Overall bend of helix axis calculated using a best-fit curvilinear axis to underlined bases.



## Supplementary Figures

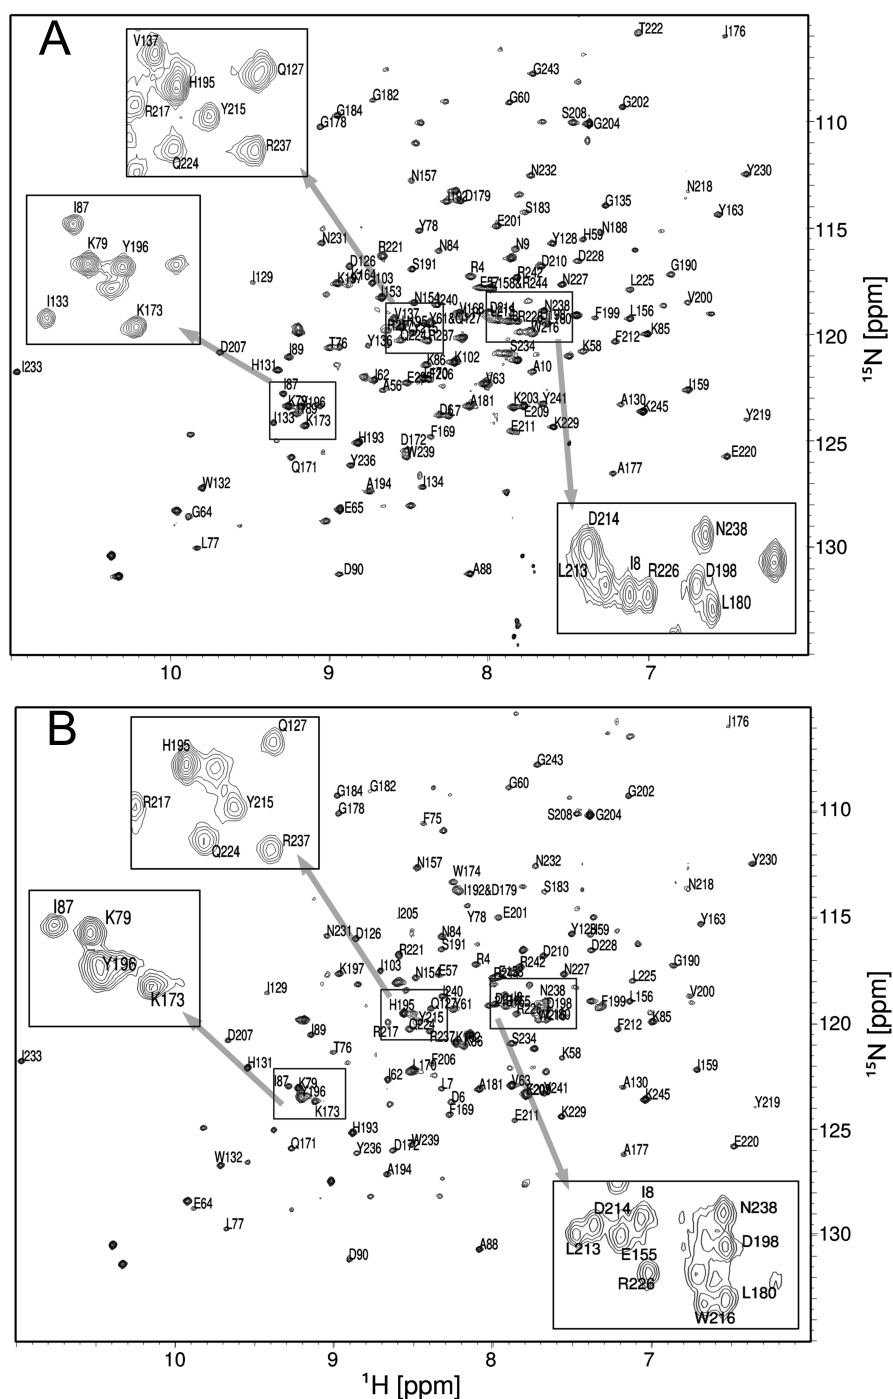

**Figure S1. Peak assignments in the two dimensional  $^1\text{H}$ - $^{15}\text{N}$  correlation spectra (TROSY) of the EcoRV-DNA complexes.** Assignments were based on inter-residue chemical shifts involving  $\text{C}_\alpha$ ,  $\text{C}_\beta$ , and carbonyl carbon shifts, distance information from amide-amide NOEs, and carbonyl specifically labeled samples. A number of amide resonances are not observable, possibly due to dipolar interactions with the protonated DNA. Although the majority of observed resonances are assigned, a small number of peaks remained unassigned due to missing connectivities to other residues. Spectra of metal-free complex (A) and complex with saturating  $\text{Lu}^{3+}$  (B).

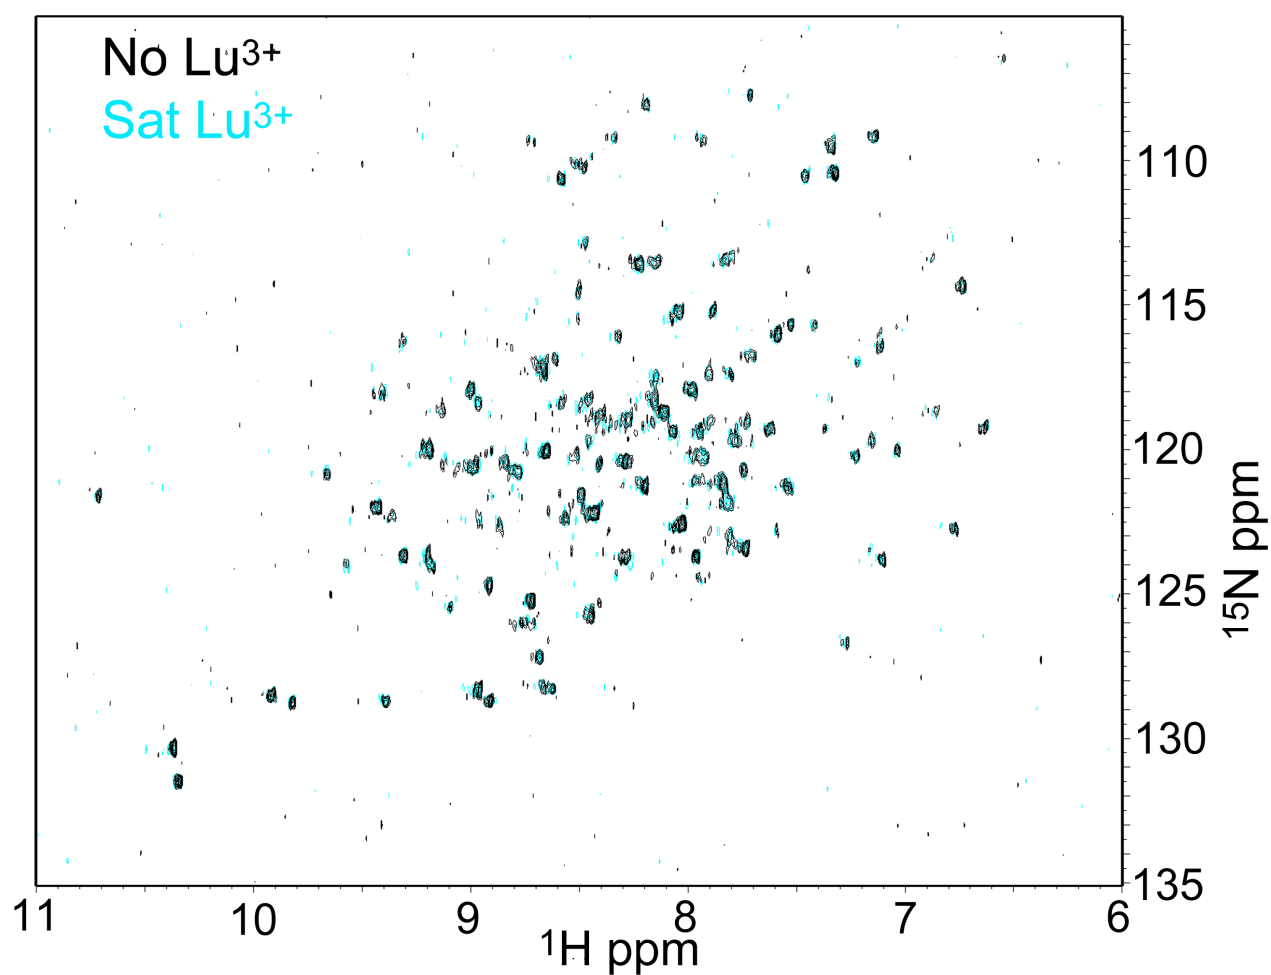

**Figure S2.**  $^1\text{H}$ - $^{15}\text{N}$  HSQC-TROSY spectra of nonspecific EcoRV-DNA complexes. Black peaks indicate no metal ions and cyan peaks indicate saturating  $\text{Lu}^{3+}$ . The near-complete absence of CSPs indicates that metal-ion binding sites are not assembled in the nonspecific EcoRV-DNA complex, consistent with the methyl resonance data in Figures 1D and 1F.

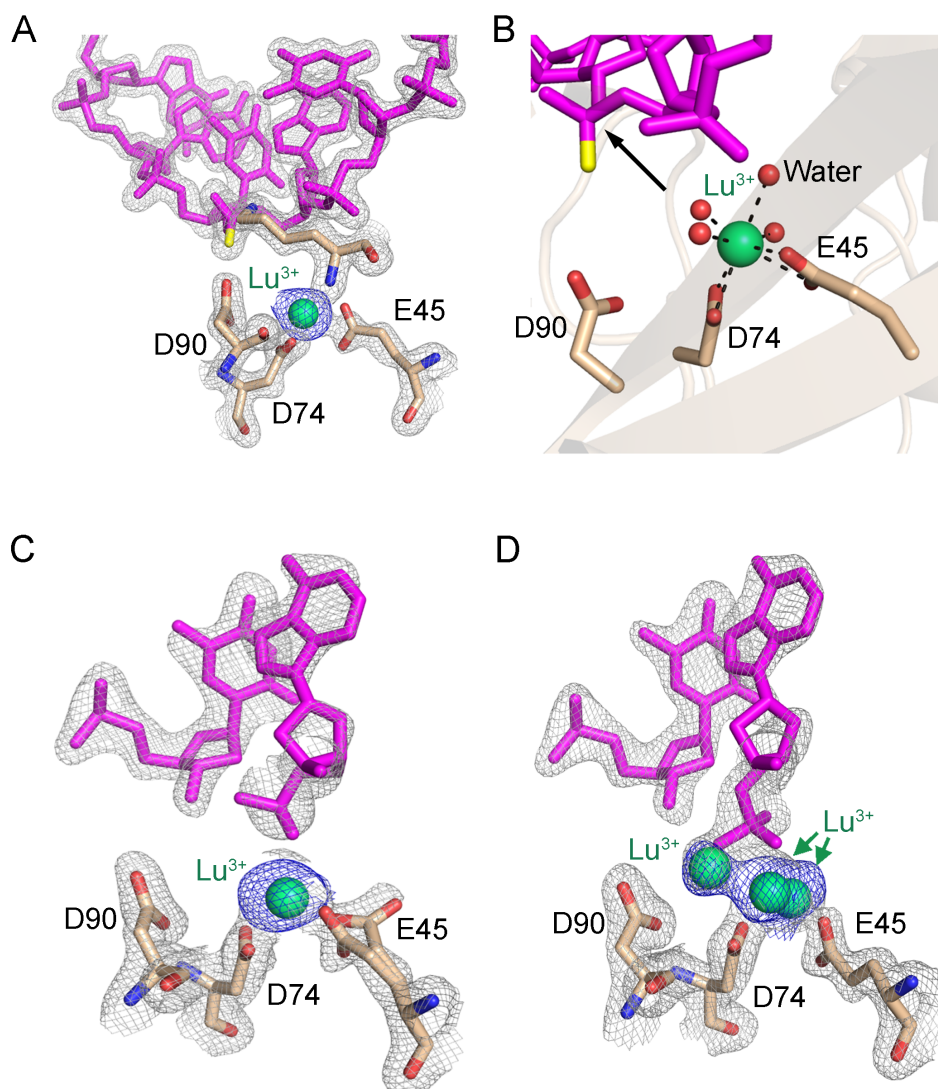

**Figure S3.  $\text{Lu}^{3+}$  coordination in EcoRV-DNA- $\text{Lu}^{3+}$  complexes with uncleaved and cleaved DNA.** DNA is colored magenta, residues from EcoRV are CPK (carbon light brown), and  $\text{Lu}^{3+}$  ions are teal.  $2F_o - F_c$  maps are gray and contoured at  $2\sigma$  (A) or  $1\sigma$  (C and D). Anomalous difference maps are blue and contoured at  $5\sigma$  (A) or  $3\sigma$  (C and D). Panels (A) and (B) show the complex with uncleaved DNA (PDB entry 5F8A), with active site sidechains (E45, D74, D90) labeled. The  $\text{Lu}^{3+}$  ion is in neither the A-site nor the B-site occupied by  $\text{Mg}^{2+}$  in PDB entry 1RVB. Panel (B) shows the octahedral coordination sphere for  $\text{Lu}^{3+}$ , with ligands within 2.6 Å of the  $\text{Lu}^{3+}$  ion. Arrow indicates the scissile phosphate. Panels (C) and (D) show bound  $\text{Lu}^{3+}$  in the two different active sites of the post-cleavage complex (PDB entry 5HKL). K92 and additional DNA bases were removed for clarity.

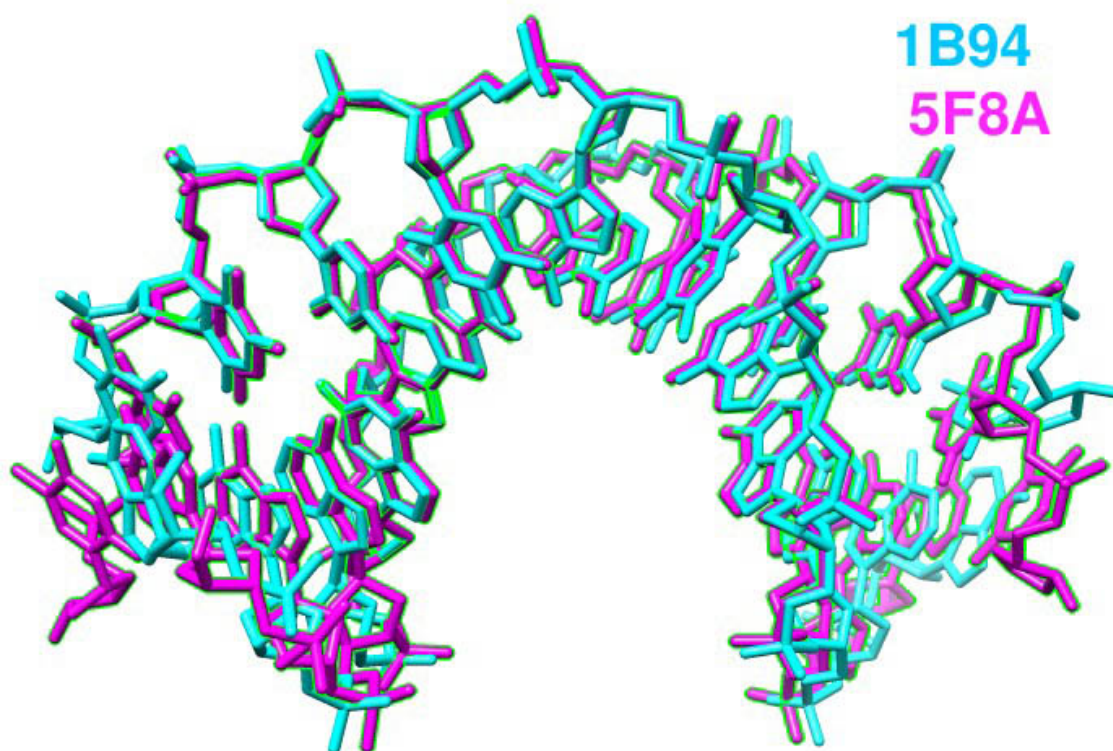

**Figure S4. Comparison of DNA bends in EcoRV-DNA crystal structures with 2 Lu<sup>3+</sup> (PDB entry 5F8A, magenta) or 2 Ca<sup>2+</sup> (PDB entry 1B94, cyan).** Models were aligned on the backbones of EcoRV residues 62-93 (includes strands  $\beta$ 1,  $\beta$ 2,  $\beta$ 3; cf. Fig. 5). Detailed conformational parameters are given in Table S3.

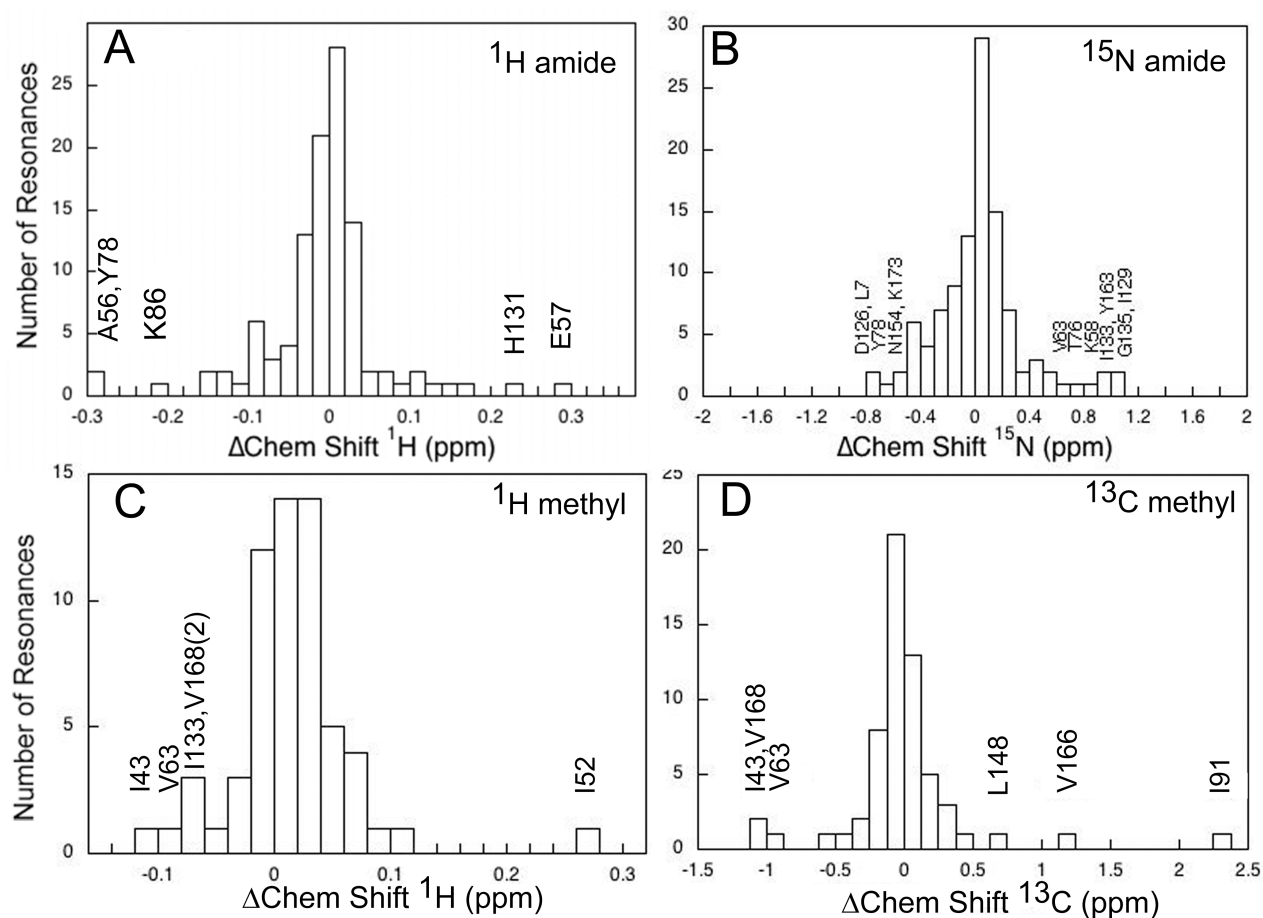

**Figure S5.** Distributions of (A and B) amide ( $^1\text{H}$  and  $^{15}\text{N}$ ) and (C,D) methyl ( $^1\text{H}$  and  $^{13}\text{C}$ ) chemical shift changes induced by saturating  $\text{Lu}^{3+}$ . In all cases, the X-axis shows the chemical shift in the designated EcoRV-DNA- $(\text{Lu}^{3+})_4$  complex minus that in the EcoRV-DNA complex with no metal. Residues with unusually large  $\Delta\delta$  are labeled above the appropriate bars.

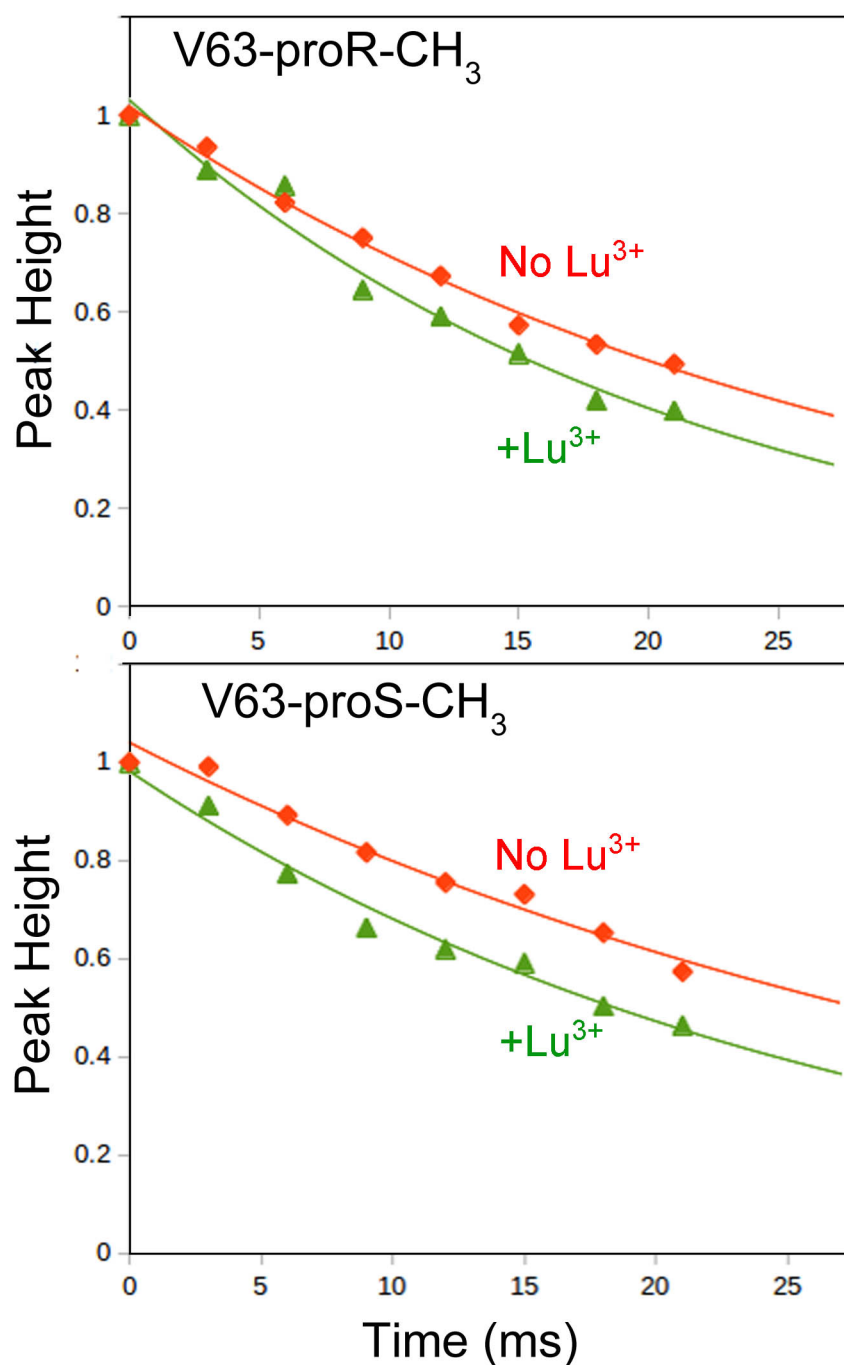

**Figure S6.** <sup>1</sup>H transverse relaxation decay curves of stereospecifically assigned V63 methyl side-chain in EcoRV-DNA and EcoRV-DNA-(Lu<sup>3+</sup>)<sub>4</sub> complexes. This complex was labeled with diamagnetic MTS (Materials and Methods) at position S234C, as a control in a series of PRE studies. Experimental data were fitted to a two-parameter single exponential function to obtain relaxation rate constants as follows. proR-CH<sub>3</sub> no Lu<sup>3+</sup>: 0.035±0.001 s<sup>-1</sup>; proR-CH<sub>3</sub> + Lu<sup>3+</sup>: 0.046±0.003 s<sup>-1</sup>; proS-CH<sub>3</sub> no Lu<sup>3+</sup>: 0.026±0.002 s<sup>-1</sup>; proR-CH<sub>3</sub> + Lu<sup>3+</sup>: 0.038±0.002 s<sup>-1</sup>.

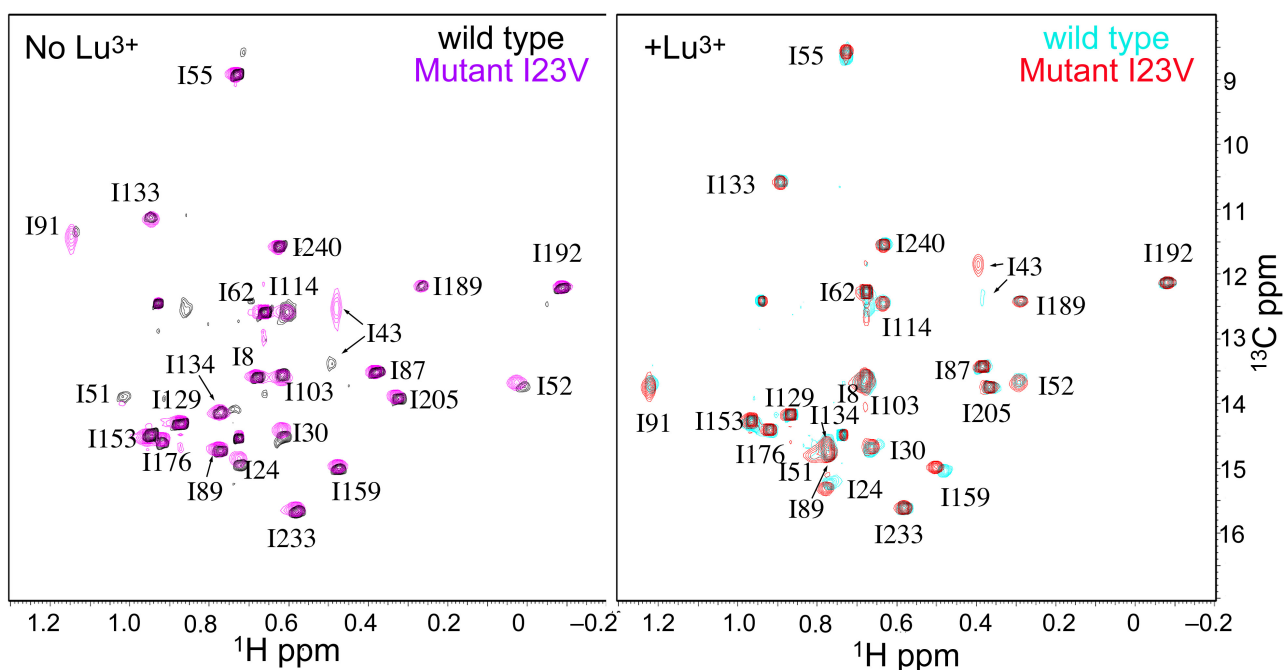

**Figure S7. Effect of the I23V mutation on Ile- $\delta$ -CH<sub>3</sub> resonances with and without saturating Lu<sup>3+</sup>.** The mutation primarily affects the peak for I43- $\delta$ -CH<sub>3</sub> (see Discussion). The resonance for I23- $\delta$ -CH<sub>3</sub> itself is unassigned.

### References

- (1) Lavery, R., Moakher, M., Maddocks, J. H., Petkeviciute, D., and Zakrzewska, K. (2009) Conformational analysis of nucleic acids revisited: Curves, *Nucleic Acids Research* 37, 5917-5929.
- (2) Horton, N. C., and Perona, J. J. (2000) Crystallographic snapshots along a protein-induced DNA-bending pathway, *Proc. Natl. Acad. Sci. U S A* 97, 5729-5734.
